# Supplementary material for: Cardiovascular Health, Adiposity, and Food Insecurity in an Underserved Population
Source: PubMed Central journal article supplement (PMC6628173; doi:10.3390/nu11061376), 2019-06-19
Supplement: nutrients-11-01376-s001.pdf [file nutrients-11-01376-s001.pdf]

Table S1. Baseline Characteristics of PROPEL Patients by Sex and Race.

|                                 | Male<br>(n=123) | Female<br>(n=677) | p-value | White<br>(n=207) | African American (n=538) | Other<br>(n=55) | p-value |
|---------------------------------|-----------------|-------------------|---------|------------------|--------------------------|-----------------|---------|
| BMI (kg/m <sup>2</sup> )        | 37.4 (4.5)      | 37.3 (4.7)        | 0.699   | 37.3 (4.6)       | 37.2 (4.6)               | 38.2 (5.0)      | 0.325   |
| Waist circumference (cm)        | 122.7 (11.9)    | 111.8 (11.8)      | <0.001  | 114.6 (13.3)     | 113.0 (12.3)             | 114.2 (10.6)    | 0.419   |
| Systolic blood pressure (mmHg)  | 127.9 (16.8)    | 122.0 (16.2)      | <0.001  | 120.0 (15.7)     | 124.1 (16.2)             | 121.6 (19.1)    | 0.003   |
| Diastolic blood pressure (mmHg) | 80.0 (10.7)     | 79.0 (10.6)       | 0.321   | 78.1 (9.8)       | 79.6 (10.5)              | 78.9 (13.8)     | 0.348   |
| Total cholesterol (mg/dL)       | 169.4 (40.4)    | 181.6 (36.3)      | 0.001   | 181.4 (37.9)     | 178.3 (37.1)             | 187.0 (34.5)    | 0.157   |
| Glucose (mg/dL)                 | 120.3 (40.3)    | 107.1 (34.7)      | <0.001  | 110.9 (37.5)     | 108.6 (35.7)             | 107.6 (31.1)    | 0.457   |
| Food security [0-6]             | 0.9 (1.7)       | 1.4 (2.0)         | 0.010   | 1.0 (1.8)        | 1.5 (2.1)                | 1.4 (1.9)       | 0.002   |
| Food secure                     | 76.4 (94)       | 67.9 (460)        | 0.061   | 77.3 (160)       | 66.7 (359)               | 63.6 (65)       | 0.013   |
| Food insecure                   | 23.6 (29)       | 32.1 (217)        |         | 22.7 (47)        | 33.3 (179)               | 36.4 (20)       |         |
| Female                          | ----            | ----              |         | 74.9 (155)       | 88.5 (476)               | 83.6 (46)       | <0.001  |
| African American                | 50.4 (62)       | 70.3 (476)        | <0.001  | ----             | ----                     | ----            |         |
| Health literacy [0-7]           | 6.3 (1.2)       | 6.4 (1.2)         | 0.388   | 6.7 (0.7)        | 6.3 (1.2)                | 6.3 (1.5)       | <0.001  |
| ≤6 (≤8 <sup>th</sup> grade)     | 35.8 (44)       | 30.0 (203)        | 0.201   | 17.9 (37)        | 35.7 (192)               | 32.7 (18)       | <0.001  |
| 7 (≥9 <sup>th</sup> grade)      | 64.2 (79)       | 70.0 (474)        |         | 82.1 (170)       | 64.3 (346)               | 67.3 (37)       |         |
| Age                             | 54.0 (11.4)     | 48.6 (13.2)       | <0.001  | 50.3 (13.8)      | 49.5 (12.7)              | 45.3 (13.5)     | 0.028   |
| Education                       |                 |                   | 0.001   |                  |                          |                 | 0.053   |
| Less than HS                    | 7.3 (9)         | 7.7 (52)          |         | 8.2 (17)         | 6.7 (36)                 | 14.5 (8)        |         |
| HS                              | 15.4 (19)       | 23.5 (159)        |         | 25.6 (53)        | 21.0 (113)               | 21.8 (12)       |         |
| Some college                    | 33.3 (41)       | 43.3 (293)        |         | 33.3 (69)        | 45.7 (246)               | 34.5 (19)       |         |
| Bachelor's degree               | 28.5 (35)       | 14.3 (97)         |         | 20.8 (43)        | 14.7 (79)                | 18.2 (10)       |         |
| Postgraduate degree             | 15.5 (19)       | 11.1 (75)         |         | 12.1 (25)        | 11.7 (63)                | 10.9 (6)        |         |
| Income (annual family)          |                 |                   | <0.001  |                  |                          |                 | <0.001  |
| < \$10,000                      | 11.4 (14)       | 21.0 (142)        |         | 10.6 (22)        | 22.1 (119)               | 27.3 (15)       |         |
| \$10,000-\$19,999               | 10.6 (13)       | 22.9 (155)        |         | 19.3 (40)        | 21.6 (116)               | 21.8 (12)       |         |
| \$20,000-\$39,999               | 16.3 (20)       | 25.1 (170)        |         | 20.8 (43)        | 25.1 (135)               | 21.8 (12)       |         |
| \$40,000-\$59,999               | 17.9 (22)       | 14.0 (95)         |         | 12.6 (26)        | 15.8 (85)                | 10.9 (6)        |         |
| ≥\$60,000                       | 39.8 (49)       | 15.2 (103)        |         | 33.8 (70)        | 13.6 (73)                | 16.4 (9)        |         |
| Marital status                  |                 |                   | <0.001  |                  |                          |                 | 0.019   |
| Married                         | 55.3 (68)       | 34.1 (231)        |         | 47.3 (98)        | 34.0 (183)               | 32.7 (18)       |         |
| Divorced/separated              | 19.5 (24)       | 27.6 (187)        |         | 23.7 (49)        | 27.9 (150)               | 21.8 (12)       |         |

|               |           |            |           |            |           |
|---------------|-----------|------------|-----------|------------|-----------|
| Never married | 23.6 (29) | 29.5 (200) | 24.2 (50) | 29.4 (158) | 38.2 (21) |
| Widowed       | 1.6 (2)   | 8.7 (59)   | 4.8 (10)  | 8.7 (47)   | 7.3 (4)   |

Continuous variables are reported as mean (SD). Categorical variables are reported as n (%). Statistically significant differences were assessed using independent samples t-tests for continuous variables and chi-square tests for categorical variables. Boldface indicates statistical significance ( $p < 0.05$ ).

Table S2. LS7 Scores for PROPEL Patients by Sex and Race.

|                   | Male<br>(n=123) | Female<br>(n=677) | <i>p-value</i>   | White<br>(n=207) | African<br>American (n=538) | Other<br>(n=55) | <i>p-value</i> |
|-------------------|-----------------|-------------------|------------------|------------------|-----------------------------|-----------------|----------------|
| LS7 [0-14]        | 6.3 (1.7)       | 6.8 (1.9)         | <b>0.016</b>     | 6.6 (1.9)        | 6.8 (1.9)                   | 6.7 (1.6)       | 0.386          |
| Poor              | 83.7 (103)      | 75.5 (511)        | 0.094            | 76.8 (159)       | 76.2 (140)                  | 81.8 (45)       | 0.794          |
| Intermediate      | 9.8 (12)        | 17.4 (118)        |                  | 17.4 (36)        | 16.4 (88)                   | 10.9 (6)        |                |
| Ideal             | 0.8 (1)         | 1.0 (7)           |                  | 1.0 (2)          | 0.9 (5)                     | 1.8 (1)         |                |
| Smoking           |                 |                   | 0.407            |                  |                             |                 | <b>0.013</b>   |
| Poor              | 7.3 (9)         | 11.2 (76)         |                  | 15.5 (32)        | 8.0 (43)                    | 18.2 (10)       |                |
| Intermediate      | 3.3 (4)         | 3.7 (25)          |                  | 3.9 (8)          | 3.5 (19)                    | 3.6 (2)         |                |
| Ideal             | 89.4 (101)      | 84.9 (575)        |                  | 80.2 (166)       | 88.5 (476)                  | 78.2 (43)       |                |
| Healthy diet      |                 |                   | 0.111            |                  |                             |                 | 0.154          |
| Poor              | 76.0 (94)       | 68.2 (462)        |                  | 68.6 (142)       | 70.4 (379)                  | 63.6 (35)       |                |
| Intermediate      | 23.6 (29)       | 29.8 (202)        |                  | 31.3 (65)        | 27.5 (148)                  | 32.7 (18)       |                |
| Ideal             | 0.0 (0)         | 1.6 (11)          |                  | 0.0 (0)          | 1.7 (9)                     | 3.6 (2)         |                |
| Physical activity |                 |                   | <b>0.002</b>     |                  |                             |                 | 0.829          |
| Poor              | 33.3 (41)       | 47.7 (323)        |                  | 43.0 (89)        | 46.5 (250)                  | 45.5 (25)       |                |
| Intermediate      | 12.2 (15)       | 14.2 (96)         |                  | 15.5 (32)        | 13.0 (70)                   | 3.6 (2)         |                |
| Ideal             | 52.8 (65)       | 36.2 (245)        |                  | 40.1 (83)        | 38.5 (207)                  | 49.1 (27)       |                |
| BMI               |                 |                   | ----             |                  |                             |                 | ----           |
| Poor              | 100 (123)       | 100 (677)         |                  | 100 (207)        | 100 (538)                   | 100 (55)        |                |
| Intermediate      | 0.0 (0)         | 0.0 (0)           |                  | 0.0 (0)          | 0.0 (0)                     | 0.0 (0)         |                |
| Ideal             | 0.0 (0)         | 0.0 (0)           |                  | 0.0 (0)          | 0.0 (0)                     | 0.0 (0)         |                |
| Blood pressure    |                 |                   | <b>&lt;0.001</b> |                  |                             |                 | 0.498          |
| Poor              | 28.5 (35)       | 21.1 (143)        |                  | 19.3 (40)        | 23.8 (128)                  | 18.2 (10)       |                |
| Intermediate      | 64.2 (79)       | 55.1 (373)        |                  | 58.5 (121)       | 55.9 (301)                  | 54.5 (30)       |                |
| Ideal             | 7.3 (9)         | 23.6 (160)        |                  | 22.2 (46)        | 20.1 (108)                  | 27.3 (15)       |                |
| Total cholesterol |                 |                   | <b>0.016</b>     |                  |                             |                 | <b>0.040</b>   |
| Poor              | 7.3 (9)         | 6.8 (46)          |                  | 7.2 (15)         | 6.5 (35)                    | 9.1 (5)         |                |

|              |           |            |                  |            |            |           |       |
|--------------|-----------|------------|------------------|------------|------------|-----------|-------|
| Intermediate | 51.2 (63) | 38.0 (257) |                  | 48.8 (101) | 36.8 (198) | 38.2 (21) |       |
| Ideal        | 38.2 (47) | 51.6 (349) |                  | 41.1 (85)  | 52.8 (284) | 49.1 (27) |       |
| Glucose      |           |            | <b>&lt;0.001</b> |            |            |           | 0.956 |
| Poor         | 30.9 (38) | 15.1 (102) |                  | 18.4 (38)  | 16.9 (91)  | 20.0 (11) |       |
| Intermediate | 34.1 (42) | 33.1 (224) |                  | 33.3 (69)  | 33.6 (181) | 29.1 (16) |       |
| Ideal        | 31.7 (39) | 49.5 (335) |                  | 47.3 (98)  | 46.5 (250) | 47.3 (26) |       |

Continuous variables are reported as mean (SD). Categorical variables are reported as n (%). Statistically significant differences were assessed using independent samples t-tests for continuous variables and chi-square tests for categorical variables. Boldface indicates statistical significance ( $p < 0.05$ ).
